# Supplementary material for: An Integrated Comprehensive Peptidomics and In Silico Analysis of Bioactive Peptide-Rich Milk Fermented by Three Autochthonous Cocci Strains
Source: MDPI journal article supplement (doi:10.3390/ijms25042431), 2024-02-19
Supplement: s1 [file s1]

**Table S1.** Genes of the proteolytic system of strains **A** *Lactococcus lactis* subsp. *lactis* ZGBP5-51, **B** *Enterococcus faecium* ZGBP5-52 and **C** *Enterococcus faecalis* ZGBP5-53 used for the production of BP-rich lyophilised dairy products

**A** *Lactococcus lactis* subsp. *lactis* ZGBP5-51

| Product type | Start  | End    | Strand | AA Lenght | Product                                                                              |
|--------------|--------|--------|--------|-----------|--------------------------------------------------------------------------------------|
| AP           | 111769 | 112836 | -      | 355       | Glutamyl aminopeptidase                                                              |
|              | 22827  | 25367  | +      | 846       | Lysyl aminopeptidase                                                                 |
|              | 176368 | 177426 | -      | 352       | Aminopeptidase YpdF (MP-, MA-, MS-, AP-, NP- specific)                               |
|              | 71050  | 71904  | -      | 284       | Methionine aminopeptidase                                                            |
|              | 9166   | 10407  | -      | 413       | Tripeptide aminopeptidase                                                            |
|              | 11409  | 12773  | +      | 454       | Aminopeptidase C                                                                     |
|              | 3      | 761    | +      | 252       | Aminopeptidase S (Leu, Val, Phe, Tyr preference)                                     |
|              | 868    | 1347   | -      | 159       | Putative aminopeptidase YsdC                                                         |
| PR           | 8597   | 9889   | +      | 430       | Uncharacterized protease YrrO                                                        |
|              | 21658  | 22686  | +      | 342       | Lon-like protease with PDZ domain                                                    |
|              | 15142  | 16428  | +      | 428       | Intramembrane protease RasP/YluC, implicated in cell division                        |
|              | 9990   | 11216  | -      | 408       | Serine protease, DegP/HtrA, do-like                                                  |
|              | 6547   | 7314   | +      | 255       | Prophage Clp protease-like protein                                                   |
|              | 1688   | 1837   | +      | 49        | Epidermin leader peptide processing Ser protease epiP precursor                      |
|              | 4938   | 5645   | +      | 235       | Phage head, head-tail preconnector protease C                                        |
|              | 2280   | 2870   | +      | 196       | Phage head maturation protease                                                       |
|              | 3262   | 3930   | -      | 222       | CAAX amino terminal protease family protein                                          |
|              | 1599   | 2102   | -      | 167       | Intracellular protease                                                               |
|              | 1687   | 2370   | -      | 227       | Intracellular protease                                                               |
|              | 3      | 881    | +      | 292       | Protease IV                                                                          |
| EP           | 3      | 320    | -      | 106       | Neutral endopeptidase                                                                |
|              | 3      | 206    | +      | 67        | Neutral endopeptidase                                                                |
|              | 3      | 320    | -      | 106       | Neutral endopeptidase                                                                |
|              | 1      | 1512   | -      | 504       | Neutral endopeptidase                                                                |
|              | 1266   | 1469   | -      | 67        | Neutral endopeptidase                                                                |
| P            | 109306 | 111711 | +      | 801       | Multimodular transpeptidase-transglycosylase                                         |
|              | 171541 | 172920 | +      | 459       | Dipeptidase                                                                          |
|              | 88489  | 88941  | +      | 150       | Lipoprotein signal peptidase                                                         |
|              | 103043 | 105274 | -      | 743       | Multimodular transpeptidase-transglycosylase                                         |
|              | 64484  | 66775  | +      | 763       | Xaa-Pro dipeptidyl-peptidase                                                         |
|              | 90084  | 92078  | -      | 664       | Multimodular transpeptidase-transglycosylase/Penicillin-binding protein 1A/1B (PBP1) |
|              | 7114   | 8037   | +      | 307       | Peptidase, U32 family small subunit [C1]                                             |
|              | 45802  | 47226  | +      | 474       | Dipeptidase                                                                          |
|              | 4250   | 4876   | +      | 208       | Signal peptidase I                                                                   |
|              | 7040   | 7678   | -      | 212       | Pyrrolidone-carboxylate peptidase                                                    |
| DP           | 171541 | 172920 | +      | 459       | Dipeptidase                                                                          |
|              | 6502   | 7920   | -      | 472       | Putative Xaa-His dipeptidase                                                         |
|              | 59440  | 60528  | +      | 362       | Proline dipeptidase                                                                  |
|              | 45802  | 47226  | +      | 474       | Dipeptidase                                                                          |

**Abbreviations:** AA amino acid; AP aminoprotease; PR protease; EP endopeptidase; P peptidase; DP dipeptidase

**B** *Enterococcus faecium* ZGBP5-52

| Product type | Start  | End    | Strand | AA Lenght | Product                                                                                           |
|--------------|--------|--------|--------|-----------|---------------------------------------------------------------------------------------------------|
| AP           | 24562  | 25746  | -      | 394       | Isoaspartyl aminopeptidase @ Asp-X dipeptidase                                                    |
|              | 47290  | 48369  | +      | 359       | Glutamyl aminopeptidase; Deblocking aminopeptidase                                                |
|              | 14744  | 15976  | -      | 410       | Tripeptide aminopeptidase                                                                         |
|              | 42365  | 43693  | -      | 442       | Aminopeptidase C                                                                                  |
|              | 1380   | 2612   | -      | 410       | Aminopeptidase S (Leu, Val, Phe, Tyr preference)                                                  |
|              | 4211   | 4975   | +      | 254       | Methionine aminopeptidase                                                                         |
|              | 23468  | 24532  | +      | 354       | Aminopeptidase YpdF (MP-, MA-, MS-, AP-, NP- specific)                                            |
|              | 3856   | 4938   | +      | 360       | Putative aminopeptidase YsdC                                                                      |
| PR           | 126872 | 127744 | +      | 290       | Membrane protease family protein BA0301                                                           |
|              | 61225  | 61902  | +      | 225       | Intracellular protease                                                                            |
|              | 20452  | 21738  | -      | 428       | Uncharacterized zinc protease YmfH                                                                |
|              | 21731  | 22999  | -      | 422       | FIG001621: Zinc protease                                                                          |
|              | 76522  | 77208  | +      | 228       | Late competence protein ComC, processing protease                                                 |
|              | 33588  | 34286  | +      | 232       | FIG056164: rhomboid family serine protease                                                        |
|              | 14688  | 15395  | -      | 235       | Putative membrane protease YugP                                                                   |
|              | 38786  | 40294  | +      | 502       | ATP-dependent Zn protease                                                                         |
|              | 67492  | 68115  | +      | 207       | SOS-response repressor and protease LexA                                                          |
|              | 21499  | 23733  | -      | 744       | ATP-dependent Clp protease, ATP-binding subunit ClpE                                              |
|              | 29875  | 30423  | +      | 182       | ATP-dependent protease subunit HslV                                                               |
|              | 30437  | 31837  | +      | 466       | ATP-dependent hsl protease ATP-binding subunit HslU                                               |
|              | 50169  | 51458  | -      | 429       | Serine protease, DegP/HtrA, do-like                                                               |
|              | 48690  | 49343  | -      | 217       | ClpCP protease substrate adapter protein MecA                                                     |
|              | 17323  | 17916  | +      | 197       | ATP-dependent Clp protease proteolytic subunit ClpP                                               |
|              | 34172  | 35197  | +      | 341       | Protease IV                                                                                       |
|              | 16368  | 17411  | +      | 347       | Lon-like protease with PDZ domain                                                                 |
|              | 10149  | 10262  | +      | 37        | CAAX amino terminal protease family protein                                                       |
|              | 18737  | 19987  | -      | 416       | ATP-dependent Clp protease ATP-binding subunit ClpX                                               |
|              | 4560   | 5810   | +      | 416       | Uncharacterized protease YrrO                                                                     |
|              | 915    | 3407   | +      | 830       | ATP-dependent Clp protease, ATP-binding subunit ClpC                                              |
|              | 5556   | 5675   | -      | 39        | Uncharacterized protein sporadically distributed in bacteria and archaea, not a Lon-type protease |
| EP           | 14156  | 16063  | -      | 635       | Neutral endopeptidase O                                                                           |
| P            | 119944 | 122289 | -      | 781       | Multimodular transpeptidase-transglycosylase                                                      |
|              | 24562  | 25746  | -      | 394       | Isoaspartyl aminopeptidase @ Asp-X dipeptidase                                                    |
|              | 29412  | 29876  | -      | 154       | Lipoprotein signal peptidase                                                                      |
|              | 53185  | 55566  | +      | 793       | Multimodular transpeptidase-transglycosylase/Penicillin-binding protein 1A/1B (PBP1)              |
|              | 20585  | 21136  | +      | 183       | Signal peptidase I                                                                                |
|              | 56859  | 57503  | +      | 214       | Pyrrolidone-carboxylate peptidase                                                                 |
|              | 54170  | 54739  | +      | 189       | Signal peptidase I                                                                                |
|              | 9668   | 10186  | +      | 172       | Signal peptidase type I                                                                           |
| DP           | 3628   | 4551   | +      | 307       | Peptidase, U32 family small subunit [C1]                                                          |
|              | 4684   | 6855   | +      | 723       | Multimodular transpeptidase-transglycosylase                                                      |
|              | 117285 | 118391 | -      | 368       | Proline dipeptidase                                                                               |
|              | 24562  | 25746  | -      | 394       | Isoaspartyl aminopeptidase @ Asp-X dipeptidase                                                    |
|              | 50379  | 51719  | +      | 446       | Putative Xaa-His dipeptidase                                                                      |
|              | 44095  | 45513  | +      | 472       | Putative Xaa-His dipeptidase                                                                      |

**Abbreviations:** AA amino acid; AP aminoprotease; PR protease; EP endopeptidase; P peptidase; DP dipeptidase

*C. Enterococcus faecalis* ZGBP5-53

| Product type | Start  | End    | Strand | AA Lenght | Product                                                                              |
|--------------|--------|--------|--------|-----------|--------------------------------------------------------------------------------------|
| AP           | 84606  | 85835  | +      | 409       | Tripeptide aminopeptidase                                                            |
|              | 102016 | 102261 | +      | 81        | D-aminopeptidase dipeptide-binding protein DppA                                      |
|              | 102261 | 102863 | +      | 200       | D-aminopeptidase dipeptide-binding protein DppA                                      |
|              | 81702  | 82784  | +      | 360       | Putative aminopeptidase YsdC                                                         |
|              | 65601  | 66665  | -      | 354       | Aminopeptidase YpdF (MP-, MA-, MS-, AP-, NP- specific)                               |
|              | 34841  | 36169  | +      | 442       | Aminopeptidase C                                                                     |
|              | 47325  | 48545  | -      | 406       | Tripeptide aminopeptidase                                                            |
|              | 7738   | 8814   | -      | 358       | Glutamyl aminopeptidase; Deblocking aminopeptidase                                   |
|              | 24933  | 25697  | -      | 254       | Methionine aminopeptidase                                                            |
|              | 27843  | 29081  | +      | 412       | Aminopeptidase S (Leu, Val, Phe, Tyr preference)                                     |
| PR           | 215457 | 216077 | -      | 206       | SOS-response repressor and protease LexA                                             |
|              | 284743 | 286146 | -      | 467       | ATP-dependent hsl protease ATP-binding subunit HslU                                  |
|              | 286161 | 286709 | -      | 182       | ATP-dependent protease subunit HslV                                                  |
|              | 317600 | 319033 | -      | 477       | Carboxyl-terminal protease                                                           |
|              | 420770 | 421636 | -      | 288       | Membrane protease family protein BA0301                                              |
|              | 469497 | 470750 | -      | 417       | ATP-dependent Clp protease ATP-binding subunit ClpX                                  |
|              | 148925 | 149587 | +      | 220       | ClpCP protease substrate adapter protein MecA                                        |
|              | 42349  | 43059  | +      | 236       | FIG056164: rhomboid family serine protease                                           |
|              | 164027 | 164707 | -      | 226       | Intracellular protease                                                               |
|              | 134818 | 135510 | +      | 230       | Late competence protein ComC, processing protease                                    |
|              | 64327  | 65631  | -      | 434       | Uncharacterized zinc protease YmfH                                                   |
|              | 65624  | 66892  | -      | 422       | FIG001621: Zinc protease                                                             |
|              | 2778   | 5018   | +      | 746       | ATP-dependent Clp protease, ATP-binding subunit ClpE                                 |
|              | 42294  | 43346  | -      | 350       | Lon-like protease with PDZ domain                                                    |
|              | 3327   | 3920   | +      | 197       | ATP-dependent Clp protease proteolytic subunit ClpP                                  |
|              | 4633   | 5931   | +      | 432       | Serine protease, DegP/HtrA, do-like                                                  |
|              | 50550  | 51218  | -      | 222       | Membrane-bound protease, CAAX family                                                 |
|              | 32738  | 33442  | -      | 234       | Putative membrane protease YugP                                                      |
|              | 14698  | 15945  | -      | 415       | Uncharacterized protease YrrO                                                        |
|              | 18242  | 20737  | -      | 831       | ATP-dependent Clp protease, ATP-binding subunit ClpC                                 |
| P            | 317027 | 317581 | -      | 184       | Signal peptidase I                                                                   |
|              | 360181 | 360666 | -      | 161       | Lipoprotein signal peptidase                                                         |
|              | 373994 | 376363 | +      | 789       | Multimodular transpeptidase-transglycosylase                                         |
|              | 100916 | 102019 | +      | 367       | Peptidase, M42 family                                                                |
|              | 228782 | 229957 | +      | 391       | Peptidase, M20/M25/M40 family                                                        |
|              | 188769 | 189494 | -      | 241       | Signal peptidase I                                                                   |
|              | 153784 | 155082 | -      | 432       | Peptidase, M20/M25/M40 family                                                        |
|              | 162587 | 164923 | +      | 778       | Multimodular transpeptidase-transglycosylase/Penicillin-binding protein 1A/1B (PBP1) |
|              | 202997 | 203539 | -      | 180       | Signal peptidase I                                                                   |
|              | 80737  | 81378  | +      | 213       | Pyrrolidone-carboxylate peptidase                                                    |
|              | 29851  | 32037  | -      | 728       | Multimodular transpeptidase-transglycosylase                                         |
|              | 67342  | 68190  | +      | 282       | Putative peptidase A                                                                 |
|              | 36082  | 36618  | +      | 178       | Signal peptidase I                                                                   |
|              | 15973  | 16893  | -      | 306       | Peptidase, U32 family small subunit [C1]                                             |
| DP           | 379739 | 380842 | +      | 367       | Proline dipeptidase                                                                  |
|              | 47622  | 49037  | -      | 471       | Putative Xaa-His dipeptidase                                                         |

**Abbreviations:** AA amino acid; AP aminopeptidase; PR protease; P peptidase; DP dipeptidase
